# Supplementary material for: Hypermutator strains of Pseudomonas aeruginosa reveal novel pathways of resistance to combinations of cephalosporin antibiotics and beta-lactamase inhibitors
Source: PubMed Central journal article supplement (PMC9718400; doi:10.1371/journal.pbio.3001878), 2022-11-18

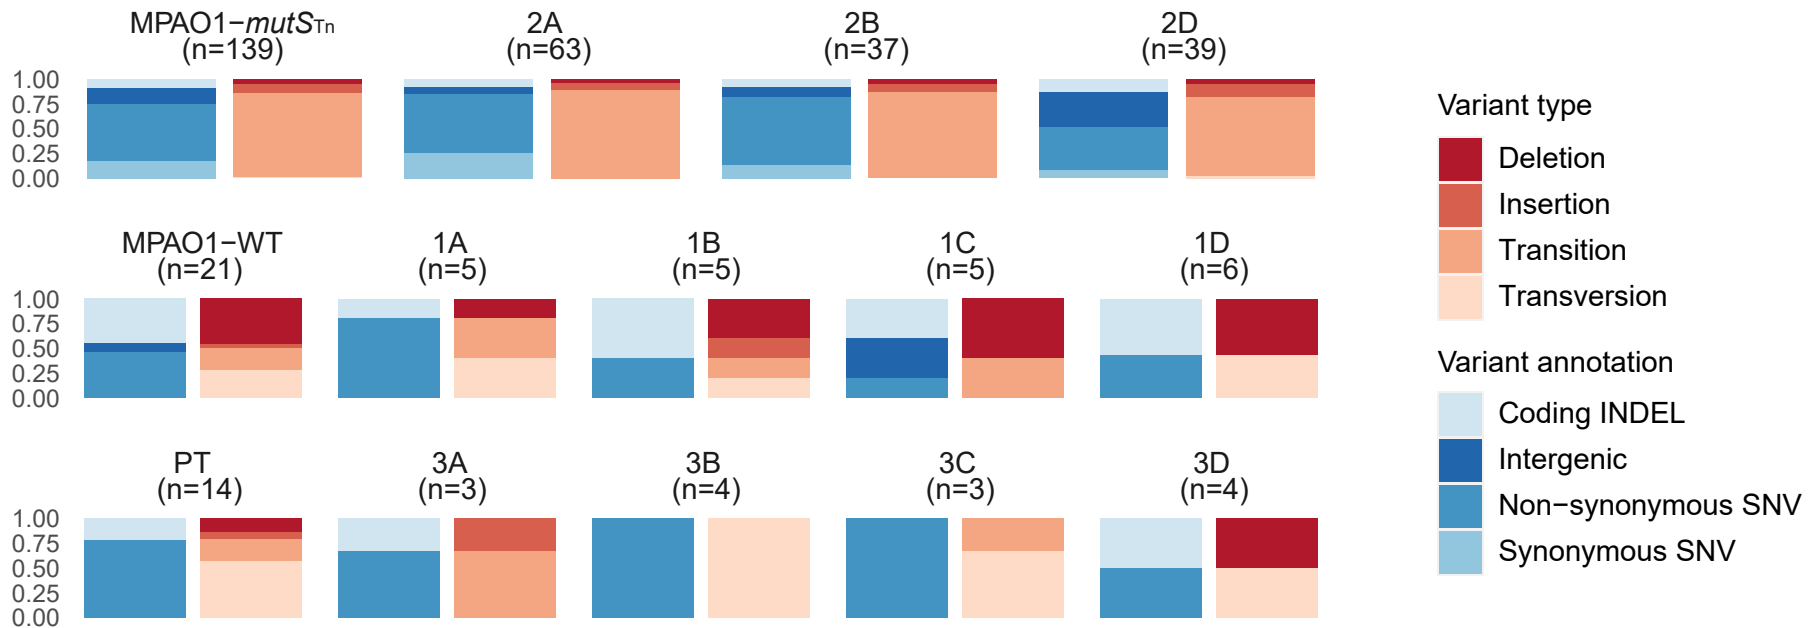

Supplement: pbio.3001878.s001.pdf [file pbio.3001878.s001.pdf]
